# Supplementary material
Source: Research Square preprint supplement (doi:10.21203/rs.3.rs-9206133/v1)
Supplement: Supplementary file 1 [file d56289d4ab68fe722b867f3c.docx]

| **Table 2.** Pearson Correlation Matrix | **Reputation** | 0.063 | 0.5297 | -0.0057 | 0.5196 | 0.0135 | 0.1678 | -0.0696 | 0.0272 | 0.1498 | 0.4215 | 0.2964 | 0.3519 | 1 |
| --- | --- | --- | --- | --- | --- | --- | --- | --- | --- | --- | --- | --- | --- | --- |
| **Tech** | -0.0045 | 0.4238 | -0.1169 | 0.3477 | -0.11 | 0.0592 | 0.0239 | 0.0359 | 0.111 | 0.2407 | 0.1189 | 1 |  |
| **Market** | -0.0205 | 0.6158 | 0.0188 | 0.6716 | 0.015 | -0.0363 | 0.1004 | -0.015 | -0.0365 | 0.1208 | 1 |  |  |
| **Policy Legal** | 0.0551 | 0.3715 | 0.0566 | 0.356 | 0.0572 | 0.0167 | -0.093 | -0.0215 | 0.1854 | 1 |  |  |  |
| **Physical** | 0.3107 | 0.1434 | -0.0688 | 0.029 | -0.0883 | -0.0666 | 0.1187 | 0.1086 | 1 |  |  |  |  |
| **Earnvol** | 0.367 | 0.0073 | -0.0398 | 0.0044 | 0.3999 | -0.0152 | -0.0063 | 1 |  |  |  |  |  |
| **Capex** | -0.0637 | 0.0801 | -0.2349 | -0.4982 | -0.0544 | -0.0427 | 1 |  |  |  |  |  |  |
| **Cash** | -0.1223 | -0.0003 | -0.0516 | 0.3462 | -0.2398 | 1 |  |  |  |  |  |  |  |
| **Size** | 0.2222 | -0.0125 | 0.6109 | 0.6009 | 1 |  |  |  |  |  |  |  |  |
| **Mod Cscore** | 0.0192 | 0.7622 | 0.1031 | 1 |  |  |  |  |  |  |  |  |  |
| **Cscore** | 0.2698 | -0.0114 | 1 |  |  |  |  |  |  |  |  |  |  |
| **Climate Disclosure** | 0.0295 | 1 |  |  |  |  |  |  |  |  |  |  |  |
| **Tobinsq** | 1 |  |  |  |  |  |  |  |  |  |  |  |  |
| **Variable** | **Tobinsq** | **Climate Disclosure** | **Cscore** | **Mod Cscore** | **Size** | **Cash** | **Capex** | **Earnvol** | **Physical** | **Policy Legal** | **Market** | **Tech** | **Reputation** |
